# Supplementary material for: Bexarotene cannot reduce amyloid beta plaques through inhibition of production of amyloid beta peptides:in silicoandin vitrostudy
Source: Royal Society of Chemistry journal article supplement (doi:10.1039/c8cp00049b), 2018-01-01
Supplement: c8cp00049b1.pdf [file c8cp00049b1.pdf]

# Supporting information for: Bexarotene cannot reduce amyloid beta plaques through inhibition of production of amyloid beta peptides: *In silico* and *in vitro* study

Pham Dinh Quoc Huy,<sup>1,2</sup> Nguyen Quoc Thai,<sup>2,3,4</sup> Zuzana Bednarikova,<sup>5</sup> Huynh Quang Linh,<sup>4</sup>  
Zuzana Gazova,<sup>5</sup> and Mai Suan Li<sup>1</sup>

<sup>1</sup>Institute of Physics, Polish Academy of Sciences, Al. Lotnikow 32/46, 02-668, Warsaw, Poland,

<sup>2</sup>Institute for Computational Science and Technology, Quang Trung Software City, Tan Chanh Hiep Ward, District 12, Ho Chi Minh City, Vietnam,

<sup>3</sup>Division of Theoretical Physics, Dong Thap University, 783 Pham Huu Lau Str., Ward 6, Cao Lanh City, Dong Thap, Vietnam,

<sup>4</sup>Biomedical Engineering Department, University of Technology - VNU HCM 268 Ly Thuong Kiet Str., Distr. 10, Ho Chi Minh City, Vietnam,

<sup>5</sup>Department of Biophysics, Institute of Experimental Physics, Slovak Academy of Sciences, Watsonova 47, 040 01 Kosice, Slovakia

E-mail: [masli@ifpan.edu.pl](mailto:masli@ifpan.edu.pl); [gazova@saske.sk](mailto:gazova@saske.sk)

**Table S1:** Atom name, atom type, and charge of bexarotene.

| Num. | Atom name | Atom Type | Charge    |
|------|-----------|-----------|-----------|
| 1    | C1        | CT        | -0.077810 |
| 2    | C2        | CT        | 0.537189  |
| 3    | C3        | CT        | -0.110215 |
| 4    | C4        | CA        | -0.071271 |
| 5    | C5        | CA        | -0.140981 |
| 6    | C6        | CA        | -0.384321 |
| 7    | C7        | CT        | 0.561644  |
| 8    | C8        | CA        | -0.246028 |
| 9    | C9        | CA        | 0.215507  |
| 10   | C10       | CA        | 0.072981  |
| 11   | H1        | HC        | 0.005864  |
| 12   | H2        | HC        | 0.005864  |
| 13   | H3        | HC        | 0.014390  |
| 14   | H4        | HC        | 0.014390  |
| 15   | H5        | HA        | 0.193910  |
| 16   | H6        | HA        | 0.149062  |
| 17   | C11       | CD        | -0.053301 |
| 18   | C12       | CM        | -0.390605 |
| 19   | H7        | HA        | 0.165233  |
| 20   | H8        | HA        | 0.165233  |
| 21   | C13       | CA        | 0.204433  |
| 22   | C14       | CA        | -0.189451 |
| 23   | C15       | CA        | -0.130122 |
| 24   | H9        | HA        | 0.144582  |
| 25   | C16       | CA        | -0.165782 |
| 26   | H10       | HA        | 0.149271  |
| 27   | C17       | CA        | -0.130122 |
| 28   | C18       | CA        | -0.189451 |
| 29   | H11       | HA        | 0.149271  |
| 30   | H12       | HA        | 0.144582  |
| 31   | C19       | C         | 0.820182  |
| 32   | O1        | O         | -0.541187 |
| 33   | O2        | OH        | -0.635151 |
| 34   | H13       | HO        | 0.407750  |
| 35   | C20       | CT        | -0.322763 |
| 36   | H14       | HC        | 0.092808  |
| 37   | H15       | HC        | 0.092808  |
| 38   | H16       | HC        | 0.092808  |
| 39   | C21       | CT        | -0.423075 |
| 40   | H17       | HC        | 0.089443  |
| 41   | H18       | HC        | 0.089443  |
| 42   | H19       | HC        | 0.089443  |
| 43   | C22       | CT        | -0.423075 |
| 44   | H20       | HC        | 0.089443  |
| 45   | H21       | HC        | 0.089443  |
| 46   | H22       | HC        | 0.089443  |
| 47   | C23       | CT        | -0.430289 |
| 48   | H23       | HC        | 0.091479  |
| 49   | H24       | HC        | 0.091479  |
| 50   | H25       | HC        | 0.091479  |
| 51   | C24       | CT        | -0.430289 |
| 52   | H26       | HC        | 0.091479  |
| 53   | H27       | HC        | 0.091479  |
| 54   | H28       | HC        | 0.091479  |

**Table S2:** Results for docking of bexarotene to equilibrium structures of receptor PPAR- $\gamma$ . In each MD trajectory, a set of 100 structures of PPAR- $\gamma$ , collected regularly at equilibration, were used to dock with bexarotene. Totally 400 docking attempts were made.

| PPAR- $\gamma$                |                                                                          |
|-------------------------------|--------------------------------------------------------------------------|
| Trajectory                    | Average of binding affinity over snapshots in each trajectory (kcal/mol) |
| Traj 1                        | -9.09 +/- 0.81                                                           |
| Traj 2                        | -8.71 +/- 0.80                                                           |
| Traj 3                        | -9.17 +/- 0.79                                                           |
| Traj 4                        | -8.75 +/- 1.02                                                           |
| Average over all trajectories | <b>-8.93 +/- 0.23</b>                                                    |

**Table S3:** The same as table S2 but for receptor RXR- $\alpha$ . Totally 400 docking attempts were made.

| RXR-alpha                     |                                                                          |
|-------------------------------|--------------------------------------------------------------------------|
| Trajectory                    | Average of binding affinity over snapshots in each trajectory (kcal/mol) |
| Traj 1                        | -9.07 +/- 1.60                                                           |
| Traj 2                        | -8.29 +/- 1.54                                                           |
| Traj 3                        | -8.99 +/- 1.70                                                           |
| Traj 4                        | -9.39 +/- 1.64                                                           |
| Average over all trajectories | <b>-8.94 +/- 0.46</b>                                                    |

**Table S4** : Docking energy of bexarotene to  $\beta$ -secretase. Results were obtained from 1500 docking attempts using snapshots collected at equilibrium in 30 MD runs as targets (see the main text for more details).

| Beta-secretase docking |                     |                                     |
|------------------------|---------------------|-------------------------------------|
| Mode                   | Trajectory          | Average binding affinity (kcal/mol) |
| Mode 1                 | Traj 1              | -7.72 +/- 0.45                      |
|                        | Traj 2              | -8.11 +/- 0.63                      |
|                        | Traj 3              | -9.00 +/- 0.81                      |
|                        | Traj 4              | -8.82 +/- 0.45                      |
|                        | Traj 5              | -8.78 +/- 0.95                      |
|                        | Traj 6              | -8.80 +/- 0.75                      |
|                        | Traj 7              | -8.38 +/- 0.65                      |
|                        | Traj 8              | -9.12 +/- 0.81                      |
|                        | Traj 9              | -7.78 +/- 0.48                      |
|                        | Traj 10             | -7.94 +/- 0.46                      |
|                        | Average over mode 1 | <b>-8.45 +/- 0.53</b>               |
| Mode 2                 | Traj 1              | -7.86 +/- 0.56                      |
|                        | Traj 2              | -7.70 +/- 0.41                      |
|                        | Traj 3              | -7.48 +/- 0.38                      |
|                        | Traj 4              | -7.89 +/- 0.58                      |
|                        | Traj 5              | -7.63 +/- 0.39                      |
|                        | Traj 6              | -8.72 +/- 0.78                      |
|                        | Traj 7              | -7.71 +/- 0.58                      |
|                        | Traj 8              | -8.10 +/- 0.64                      |
|                        | Traj 9              | -7.77 +/- 0.49                      |
|                        | Traj 10             | -7.77 +/- 0.59                      |
|                        | Average over mode 1 | <b>-7.86 +/- 0.34</b>               |
| Mode 3                 | Traj 1              | -7.87 +/- 0.50                      |
|                        | Traj 2              | -7.72 +/- 0.40                      |
|                        | Traj 3              | -7.85 +/- 0.56                      |
|                        | Traj 4              | -7.75 +/- 0.40                      |
|                        | Traj 5              | -7.76 +/- 0.49                      |
|                        | Traj 6              | -7.73 +/- 0.50                      |
|                        | Traj 7              | -8.00 +/- 0.51                      |
|                        | Traj 8              | -7.89 +/- 0.44                      |
|                        | Traj 9              | -7.54 +/- 0.43                      |
|                        | Traj 10             | -7.77 +/- 0.40                      |
|                        | Average over mode 3 | <b>-7.79 +/- 0.12</b>               |
| Average over all modes |                     | <b>-8.03 +/- 0.46</b>               |

**Table S5:** Binding free energy of bexarotene to PPAR- $\gamma$ . See Fig. 3 in the main text for evolution of RMSD and interaction energy.

| Traj    | $\Delta E_{\text{vdW}}$ | $\Delta E_{\text{ele}}$ | $\Delta G_{\text{PB}}$ | $\Delta G_{\text{SUR}}$ | $-T\Delta S$   | $\Delta G_{\text{bind}}$ |
|---------|-------------------------|-------------------------|------------------------|-------------------------|----------------|--------------------------|
| 1       | -50.0                   | -19.3                   | 35.5                   | -4.5                    | 19.6           | -18.7                    |
| 2       | -48.6                   | -14.9                   | 30.3                   | -4.5                    | 22.4           | -15.3                    |
| 3       | -50.7                   | -17.6                   | 36.0                   | -4.5                    | 20.9           | -15.9                    |
| 4       | -49.8                   | -14.4                   | 36.5                   | -4.7                    | 17.6           | -14.8                    |
| Average | -49.8 $\pm$ 0.9         | -16.5 $\pm$ 2.3         | 34.6 $\pm$ 2.9         | -4.6 $\pm$ 0.1          | 20.1 $\pm$ 1.4 | -16.2 $\pm$ 1.8          |

**Table S6:** Binding free energy of bexarotene to RXR- $\alpha$ . See Fig. S1 in SI for the evolution of RMSD and interaction energy.

| Traj    | $\Delta E_{\text{vdW}}$ | $\Delta E_{\text{ele}}$ | $\Delta G_{\text{PB}}$ | $\Delta G_{\text{SUR}}$ | $-T\Delta S$   | $\Delta G_{\text{bind}}$ |
|---------|-------------------------|-------------------------|------------------------|-------------------------|----------------|--------------------------|
| 1       | -52.6                   | -17.5                   | 38.9                   | -4.5                    | 20.9           | -14.9                    |
| 2       | -55.8                   | -14.9                   | 34.0                   | -4.4                    | 20.4           | -20.6                    |
| 3       | -53.0                   | -17.8                   | 39.2                   | -4.5                    | 17.9           | -18.1                    |
| 4       | -52.9                   | -20.4                   | 42.7                   | -4.5                    | 21.0           | -14.1                    |
| Average | -53.6 $\pm$ 1.5         | -17.6 $\pm$ 2.3         | 38.7 $\pm$ 3.6         | -4.5 $\pm$ 0.1          | 20.1 $\pm$ 1.4 | -16.9 $\pm$ 3.0          |

**Table S7.** Decomposition of the interaction energy into 4 groups of bexarotene (Figure S4). For PPAR- $\gamma$  (4EMA) and RXR- $\alpha$  (4K6I) the results were averaged over four MD trajectories, while for  $\beta$ -secretase (1M4H) the average over 30 trajectories of 3 modes was made.

|      |         | $E_{\text{elec}}$ | $E_{\text{vdW}}$ | $E_{\text{elec}} + E_{\text{vdW}}$ |
|------|---------|-------------------|------------------|------------------------------------|
| 4EMA | Group 1 | -10.49            | -6.22            | -16.70                             |
|      | Group 2 | 0.77              | -10.79           | -10.02                             |
|      | Group 3 | -1.86             | -29.50           | -31.36                             |
|      | Group 4 | -4.95             | -3.28            | -8.24                              |
| 4K6I | Group 1 | -10.01            | -6.24            | -16.25                             |
|      | Group 2 | -2.87             | -12.54           | -15.41                             |
|      | Group 3 | 0.17              | -30.94           | -30.77                             |
|      | Group 4 | -4.94             | -3.84            | -8.78                              |
| 1M4H | Group 1 | -3.26             | -2.46            | -5.72                              |
|      | Group 2 | -2.03             | -6.34            | -8.38                              |
|      | Group 3 | 0.21              | -15.29           | -15.08                             |
|      | Group 4 | -5.07             | -2.39            | -7.45                              |

**Table S8:** Binding free energy ,by MMPBSA method, between beta-secretase and bexarotene. Snapshots from the last 100ns were used to estimate the binding free energy (kcal/mol).

|         |         | $\Delta E_{vdW}$  | $\Delta E_{ele}$  | $\Delta G_{SUR}$ | $\Delta G_{PB}$   | $-T\Delta S$     | $\Delta G_{bind}$   | Average             |
|---------|---------|-------------------|-------------------|------------------|-------------------|------------------|---------------------|---------------------|
| Mode 1  | Traj 1  | -31.40            | -13.05            | -3.89            | 33.08             | 12.57            | -2.70               | <b>-3.57 ± 6.88</b> |
|         | Traj 2  | -36.69            | -12.14            | -4.17            | 39.38             | 13.89            | 0.28                |                     |
|         | Traj 3  | -39.79            | -21.65            | -4.50            | 45.40             | 16.56            | -3.98               |                     |
|         | Traj 4  | -31.44            | -26.58            | -4.01            | 42.17             | 16.43            | -3.43               |                     |
|         | Traj 5  | -40.51            | -20.88            | -4.53            | 45.06             | 7.37             | -13.50              |                     |
|         | Traj 6  | -39.38            | -19.69            | -4.31            | 40.32             | 22.14            | -0.92               |                     |
|         | Traj 7  | -37.05            | -5.60             | -4.00            | 27.76             | 9.11             | -9.78               |                     |
|         | Traj 8  | -37.73            | -27.11            | -4.32            | 46.07             | 10.09            | -13.00              |                     |
|         | Traj 9  | -28.99            | -12.38            | -3.69            | 30.70             | 18.06            | 3.70                |                     |
|         | Traj 10 | -27.86            | -1.57             | -3.59            | 23.36             | 17.24            | 7.59                |                     |
| Mode 2  | Traj 1  | -20.43            | -6.09             | -2.31            | 18.11             | 16.48            | 5.77                | <b>-0.46 ± 7.24</b> |
|         | Traj 2  | -21.63            | -9.65             | -2.44            | 19.95             | 21.74            | 7.97                |                     |
|         | Traj 3  | -25.35            | -7.95             | -2.90            | 18.98             | 18.35            | 1.13                |                     |
|         | Traj 4  | -29.00            | -2.48             | -3.10            | 17.00             | 19.36            | 1.78                |                     |
|         | Traj 5  | -16.13            | -3.07             | -1.92            | 10.54             | 16.03            | 5.45                |                     |
|         | Traj 6  | -44.93            | -6.50             | -4.47            | 22.89             | 15.75            | -17.26              |                     |
|         | Traj 7  | -25.58            | -10.17            | -2.98            | 21.54             | 12.75            | -4.44               |                     |
|         | Traj 8  | -25.59            | -12.92            | -2.88            | 22.72             | 17.98            | -0.69               |                     |
|         | Traj 9  | -18.81            | -5.25             | -2.26            | 15.66             | 11.33            | 0.66                |                     |
|         | Traj 10 | -22.93            | -16.37            | -2.81            | 25.34             | 11.84            | -4.93               |                     |
| Mode 3  | Traj 1  | -19.83            | -6.73             | -2.30            | 17.62             | 15.79            | 4.54                | <b>2.34 ± 2.12</b>  |
|         | Traj 2  | -19.32            | -9.06             | -2.38            | 19.26             | 12.89            | 1.39                |                     |
|         | Traj 3  | -19.93            | -1.03             | -2.53            | 9.63              | 16.62            | 2.76                |                     |
|         | Traj 4  | -12.31            | -3.84             | -1.60            | 9.57              | 10.19            | 2.00                |                     |
|         | Traj 5  | -14.78            | -5.82             | -1.88            | 12.87             | 7.98             | -1.63               |                     |
|         | Traj 6  | -21.79            | -9.38             | -2.62            | 20.23             | 17.59            | 4.02                |                     |
|         | Traj 7  | -25.33            | -5.89             | -2.88            | 20.84             | 17.39            | 4.14                |                     |
|         | Traj 8  | -20.88            | -9.70             | -2.48            | 19.45             | 14.03            | 0.41                |                     |
|         | Traj 9  | -13.30            | -7.34             | -1.49            | 14.76             | 12.30            | 4.93                |                     |
|         | Traj 10 | -25.84            | -9.63             | -2.94            | 20.89             | 18.35            | 0.84                |                     |
| Average |         | $-26.48 \pm 8.78$ | $-10.32 \pm 6.95$ | $-3.07 \pm 0.92$ | $24.37 \pm 10.97$ | $14.94 \pm 3.82$ | <b>-0.56 ± 6.20</b> |                     |

**Table S9:** Binding free energy ,by MMPBSA method, between beta-secretase and ionized bexarotene. Snapshots from the last 100ns were used to estimate the binding free energy (kcal/mol). Results were obtained for mode 1.

| Traj.   | $\Delta E_{\text{vdw}}$ | $\Delta E_{\text{ele}}$ | $\Delta G_{\text{PB}}$ | $\Delta G_{\text{SUR}}$ | $-T\Delta S$ | $\Delta G_{\text{bind}}$ |
|---------|-------------------------|-------------------------|------------------------|-------------------------|--------------|--------------------------|
| 1       | -33.76                  | 105.44                  | -83.97                 | -3.93                   | 12.18        | -4.04                    |
| 2       | -34.69                  | 98.87                   | -76.67                 | -3.90                   | 9.50         | -6.88                    |
| 3       | -33.99                  | 37.73                   | -18.46                 | -4.42                   | 15.10        | -4.05                    |
| 4       | -34.94                  | 119.94                  | -96.93                 | -3.93                   | 11.77        | -4.10                    |
| 5       | -36.20                  | 132.87                  | -110.10                | -3.95                   | 13.56        | -3.82                    |
| 6       | -35.57                  | 118.60                  | -95.81                 | -3.96                   | 21.65        | +4.91                    |
| 7       | -31.39                  | 90.19                   | -72.29                 | -3.78                   | 21.15        | +3.87                    |
| 8       | -35.33                  | 103.51                  | -75.52                 | -4.10                   | 6.93         | -4.50                    |
| 9       | -31.79                  | 82.45                   | -65.77                 | -3.89                   | 10.77        | -8.23                    |
| 10      | -38.18                  | 98.21                   | -71.05                 | -4.05                   | 9.41         | -5.66                    |
| average | -34.58±2.01             | 98.78±26.11             | -76.66±24.74           | -3.99±0.18              | 13.20±4.88   | <b>-3.25±4.28</b>        |

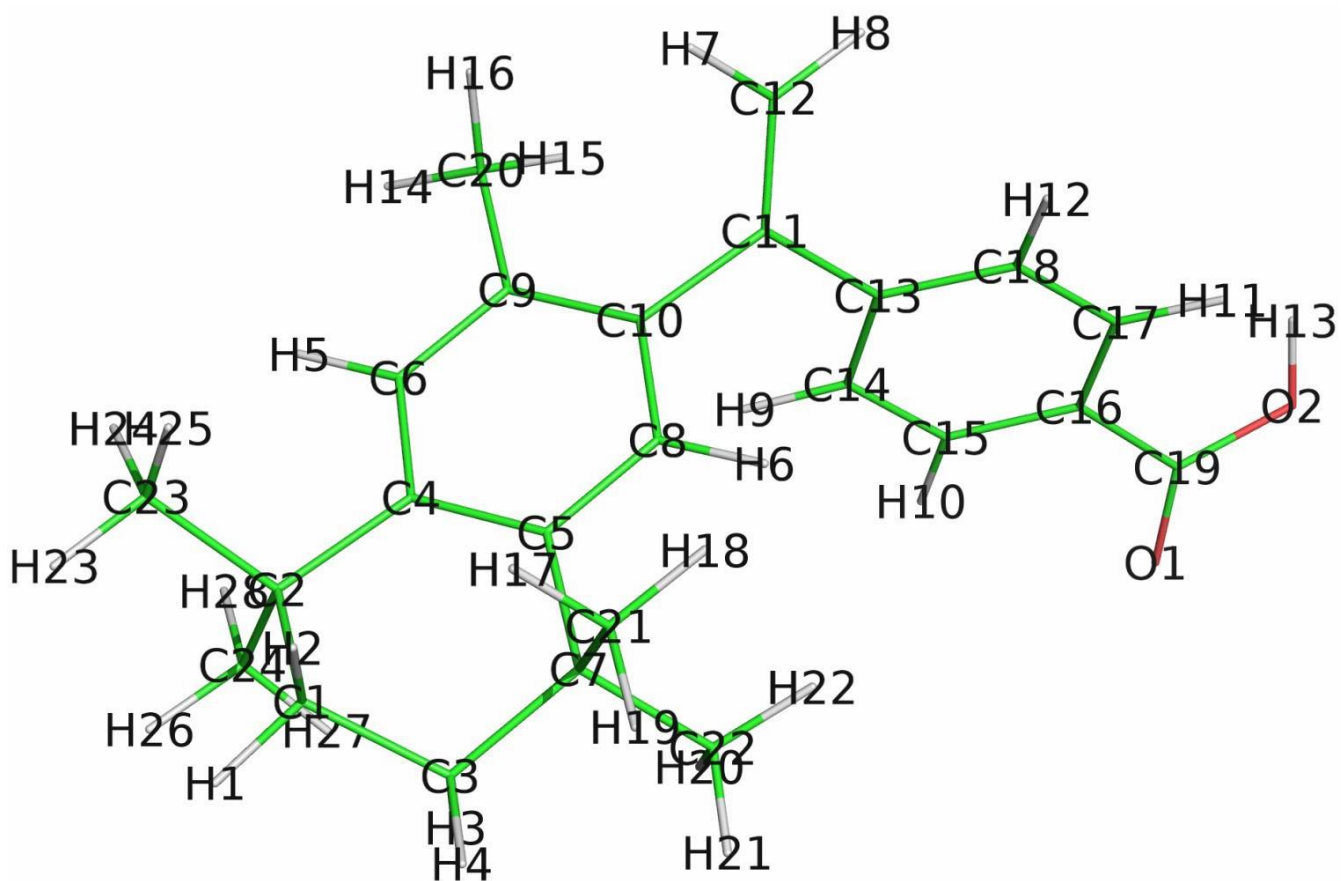

**Figure S1:** Structure of bexarotene which was optimized by Gaussian version 09 with the use of Hartree-Fock method and basis set 6-31G\*.



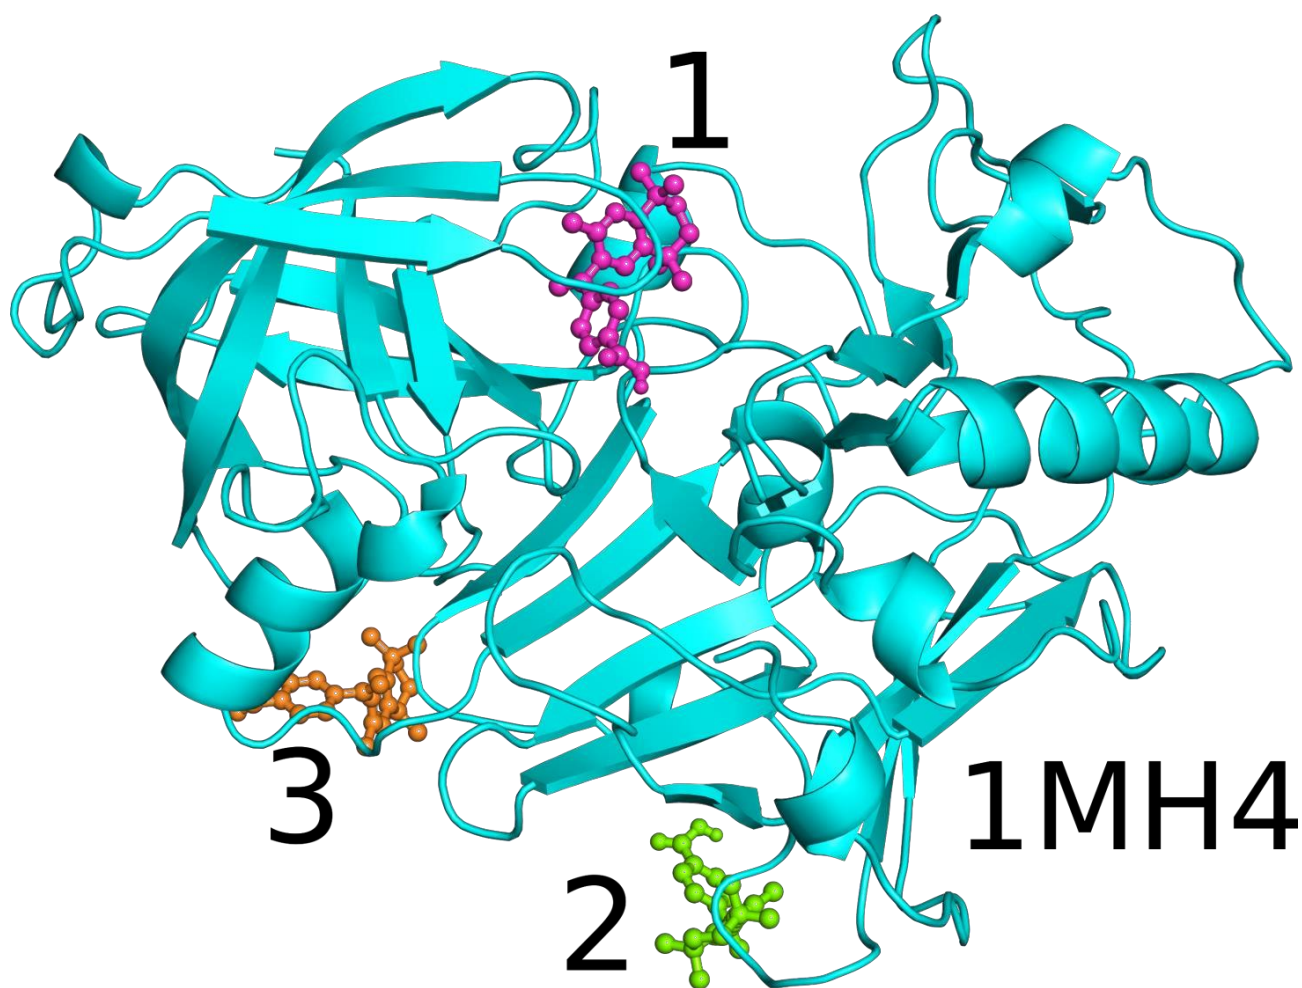

**Figure S2.** Three best docking modes (1, 2 and 3) of bexarotene to  $\beta$ -secretase. These binding positions have been used as starting configurations for three independent sets of MD simulation.

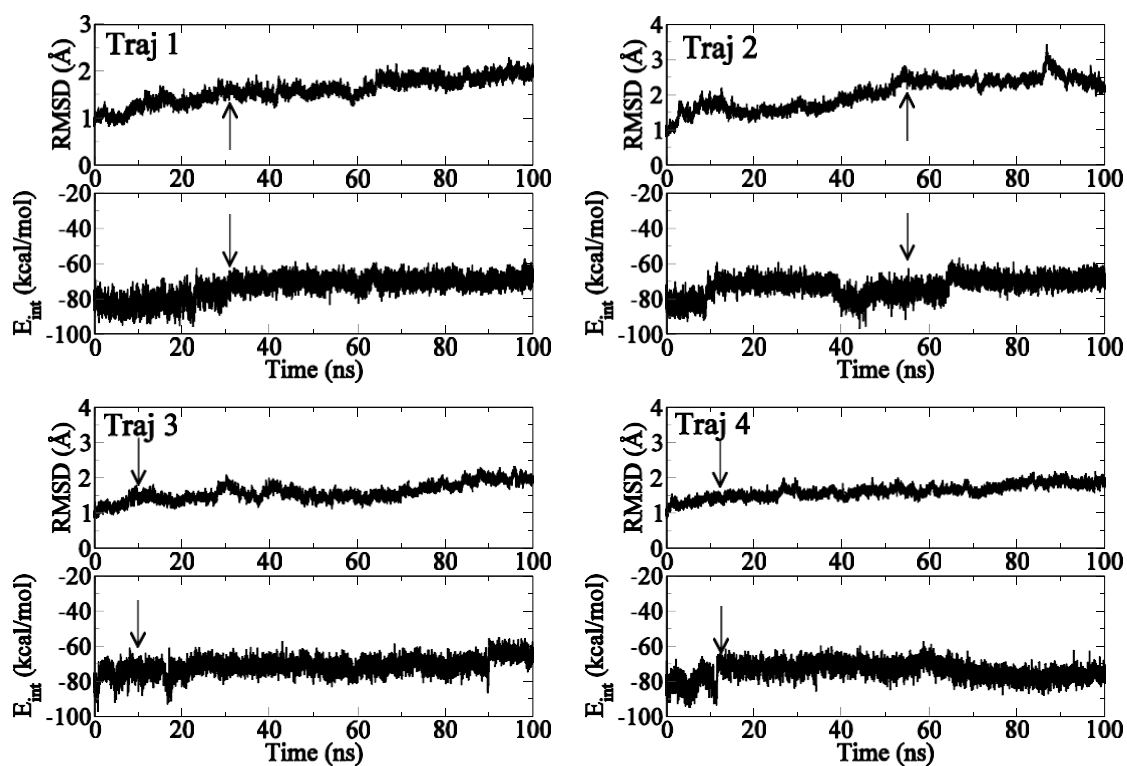

**Figure S3:** Time dependence of RMSD and the interaction energy of RXR- $\alpha$ +bexarotene complex. The arrow indicates time when the complex reaches equilibrium

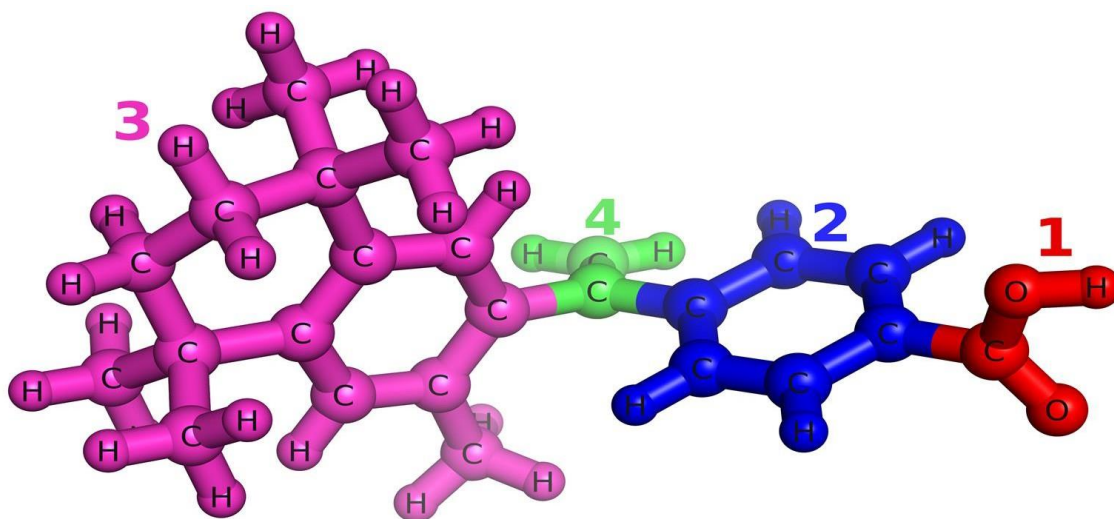

**Figure S4.** Bexarotene is divided into four groups denoted by different colors.

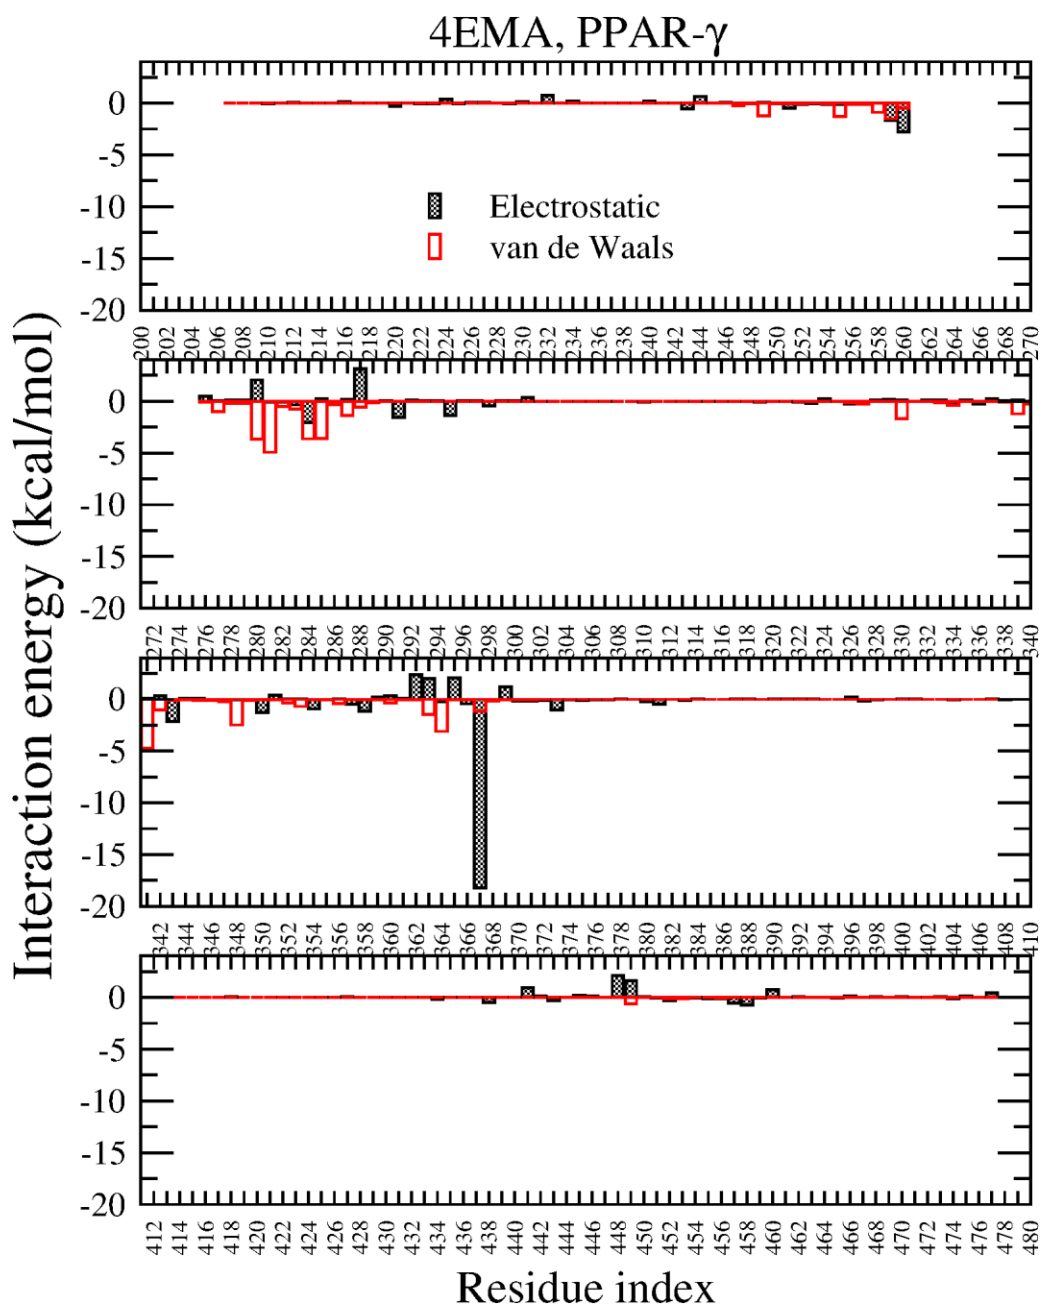

**Figure S5.** Per-residue interaction energies for PPAR- $\gamma$ . Results were averaged over 4 MD runs.

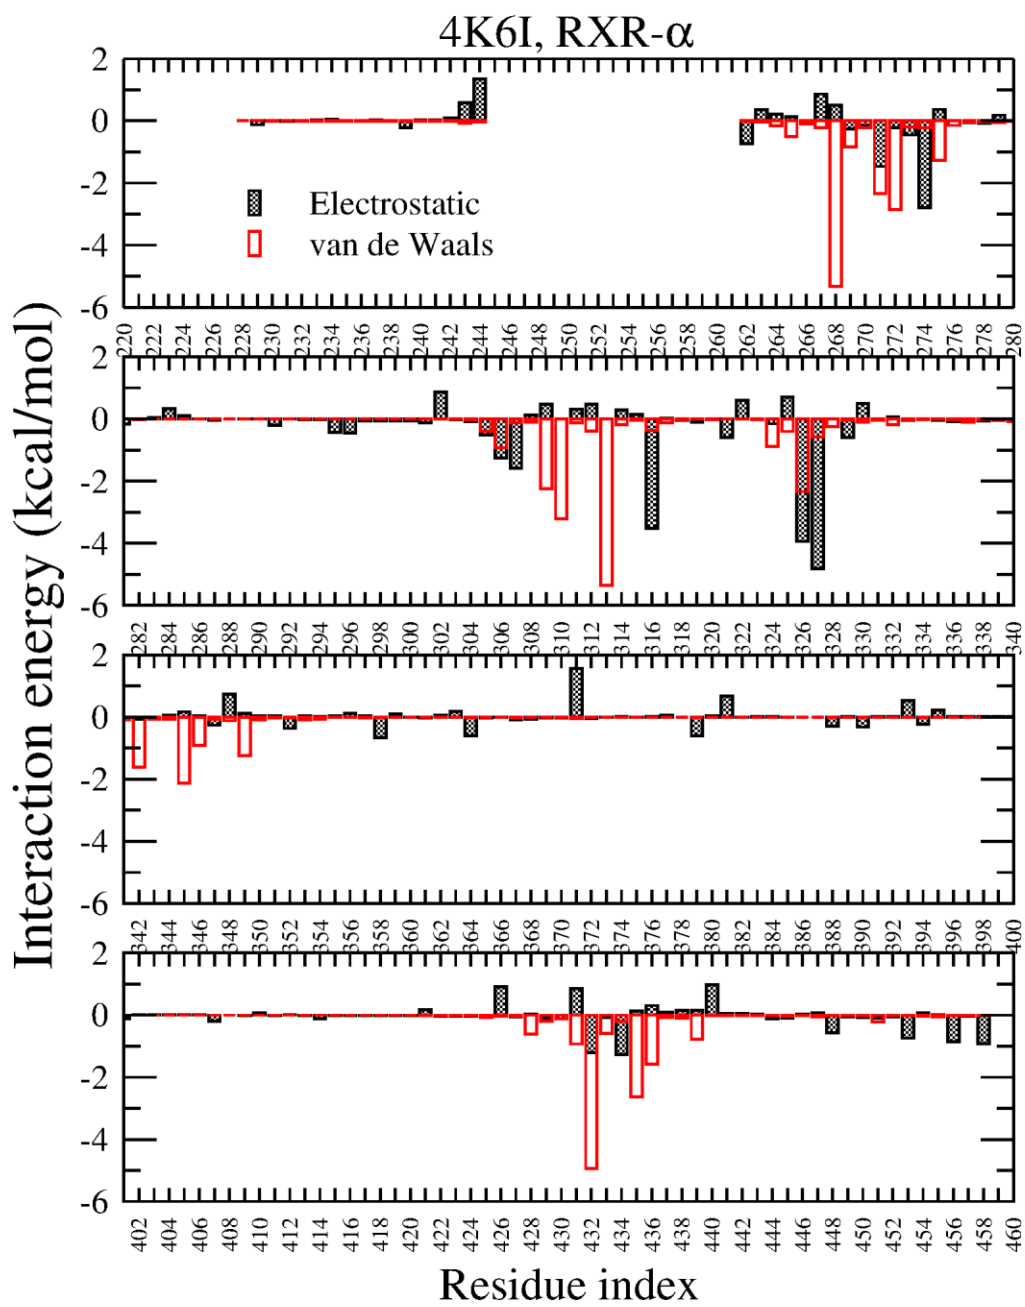

**Figure S6.** Per-residue interaction energies for RXR- $\alpha$ . Results were averaged over 4 MD runs.

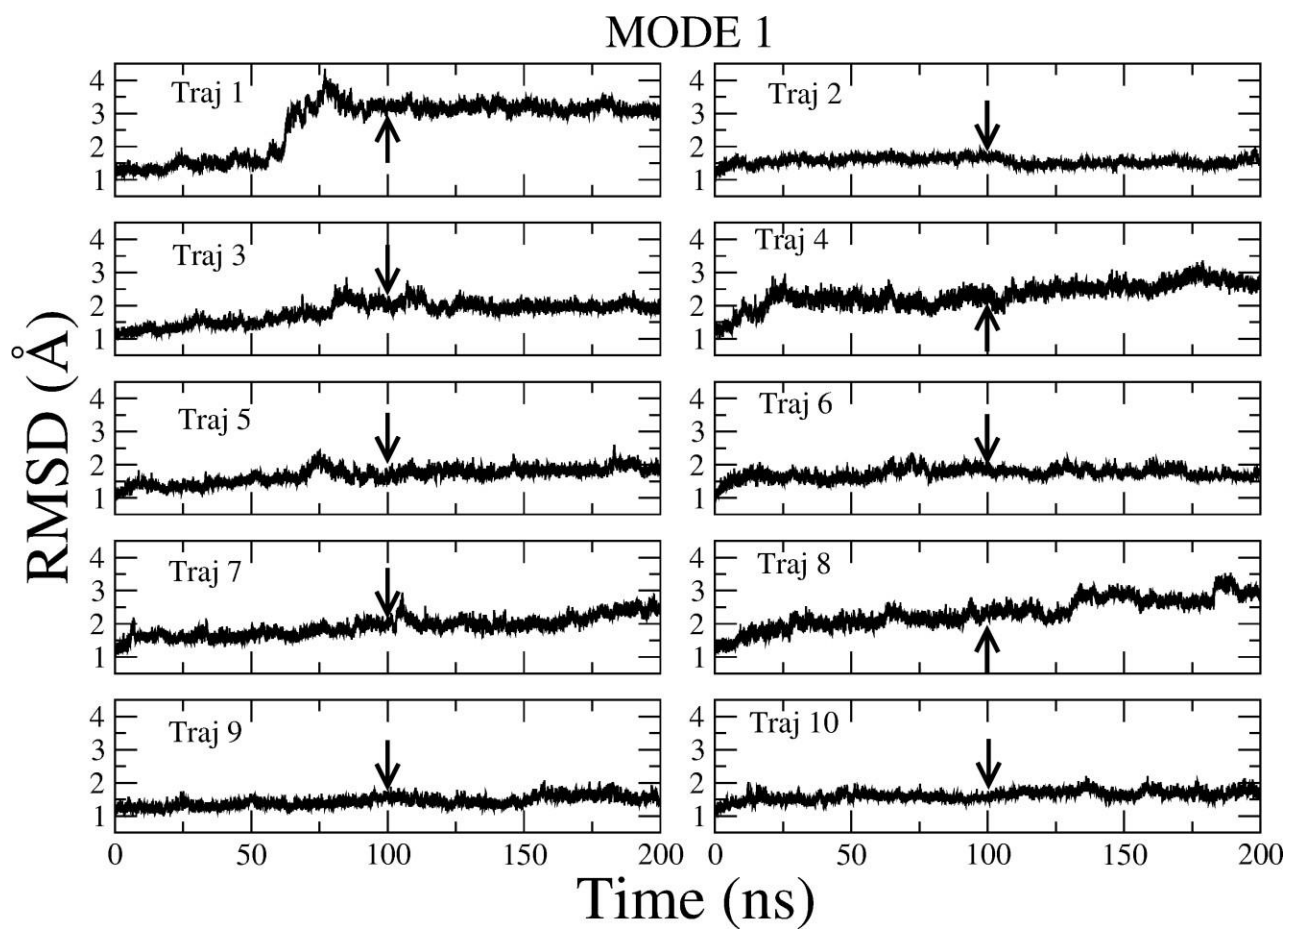

**Figure S7:** Time dependence of RMSD of  $\beta$ -secretase+bexarotene in the case where the MD simulation was performed using the configuration, obtained in Mode 1 (Fig. S2), as an initial configuration. The arrow indicates 100ns after which we have collected snapshots for estimating the binding free energy by the MM-PBSA method.

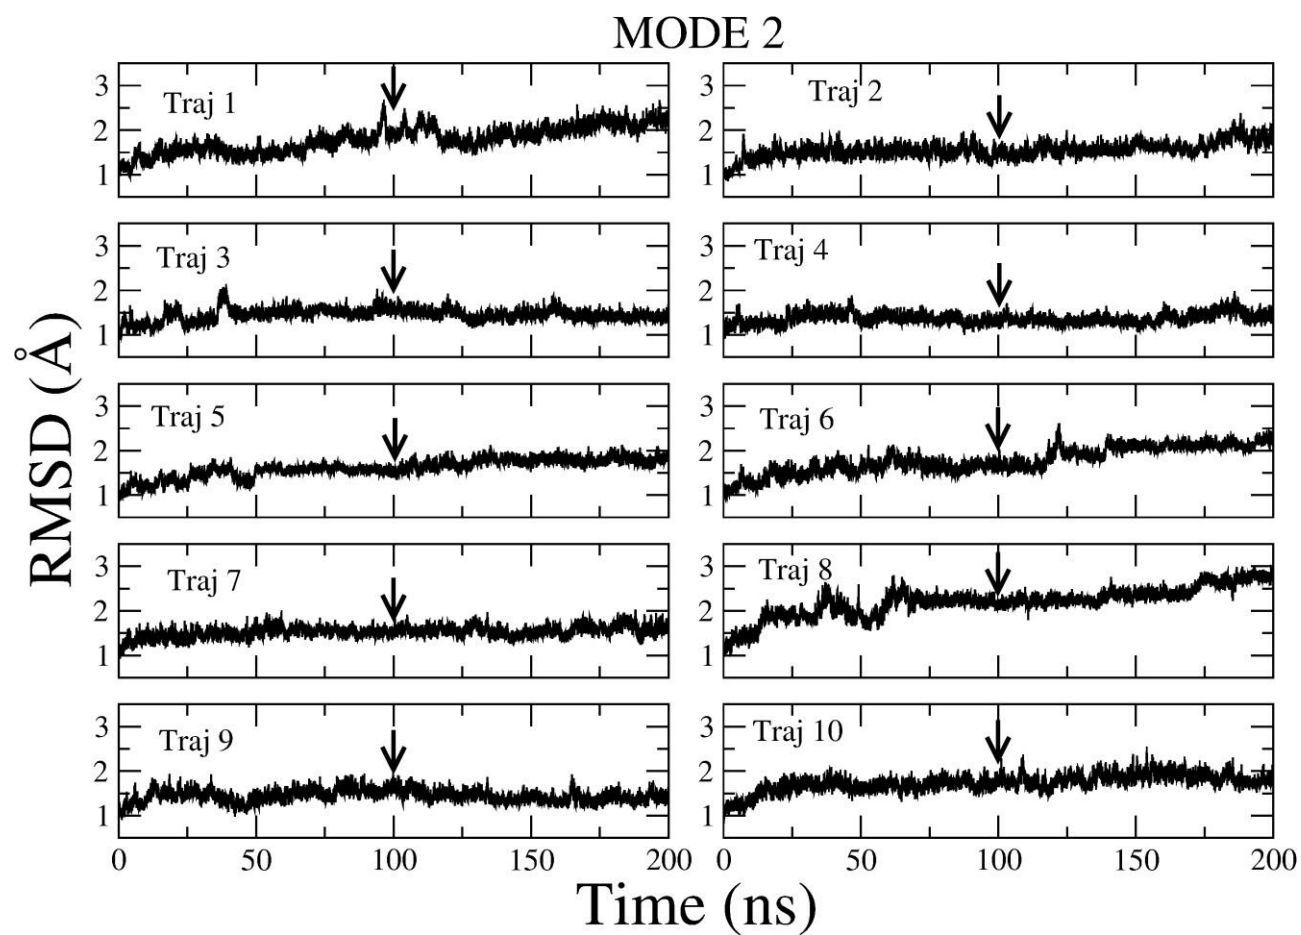

**Figure S8:** The same as in Figure S4 but for the case where the MD simulation was performed using the configuration, obtained in Mode 2 (Fig. S2), as an initial configuration.

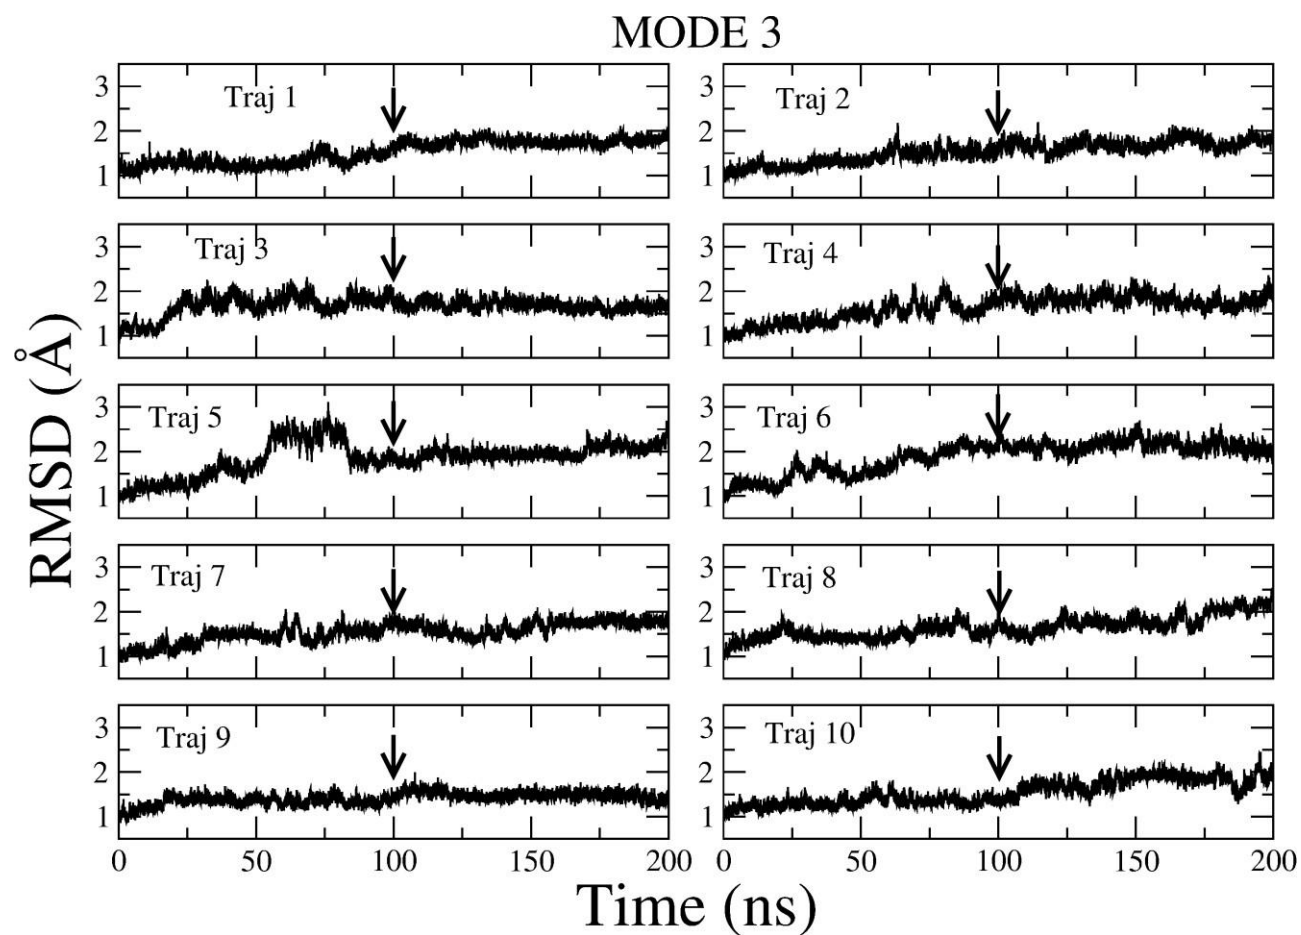

**Figure S9:** The same as in Figure S4 but for the case where the MD simulation was performed using the configuration, obtained in Mode 3 (Fig. S2), as an initial configuration.

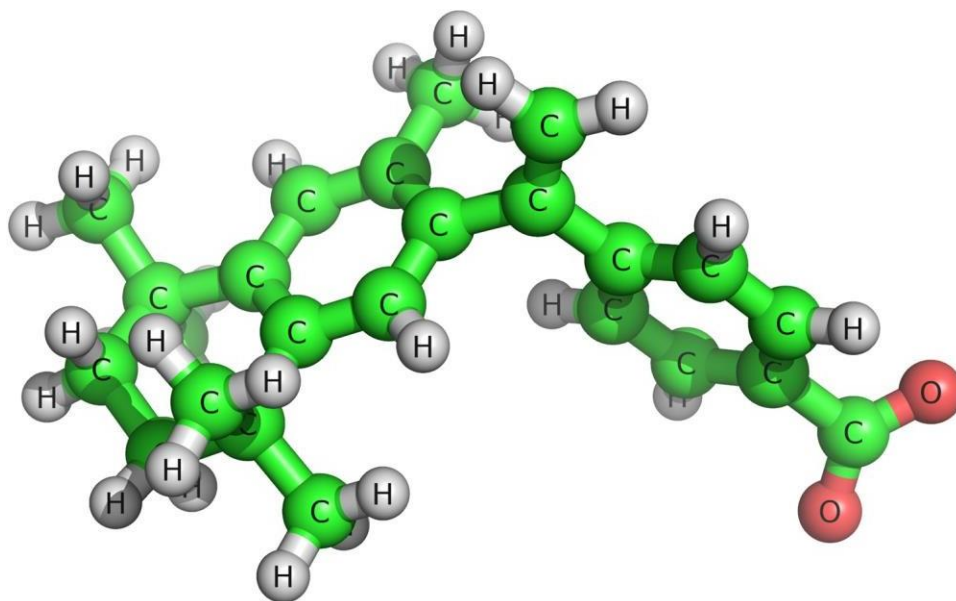

**Figure S10:** Three-dimensional structure of ionized bexarotene. The hydrogen atom from the carboxyl group is dissociated and bexarotene becomes negatively charged (-1).
